# Supplementary material for: Convalescent Plasma in a Patient with Protracted COVID-19 and Secondary Hypogammaglobulinemia Due to Chronic Lymphocytic Leukemia: Buying Time to Develop Immunity?
Source: MDPI journal article supplement (doi:10.3390/idr13040077), 2021-09-27
Supplement: s1 [file s1]

## **SUPPLEMENTARY DATA WITH MANUSCRIPT**

**Convalescent plasma in a patient with protracted COVID-19 and secondary hypogammaglobulinemia due to chronic lymphocytic leukemia: buying time to develop cellular immunity?**

Figure S1. Serology for BK polyomavirus and seasonal coronavirus 229E-N

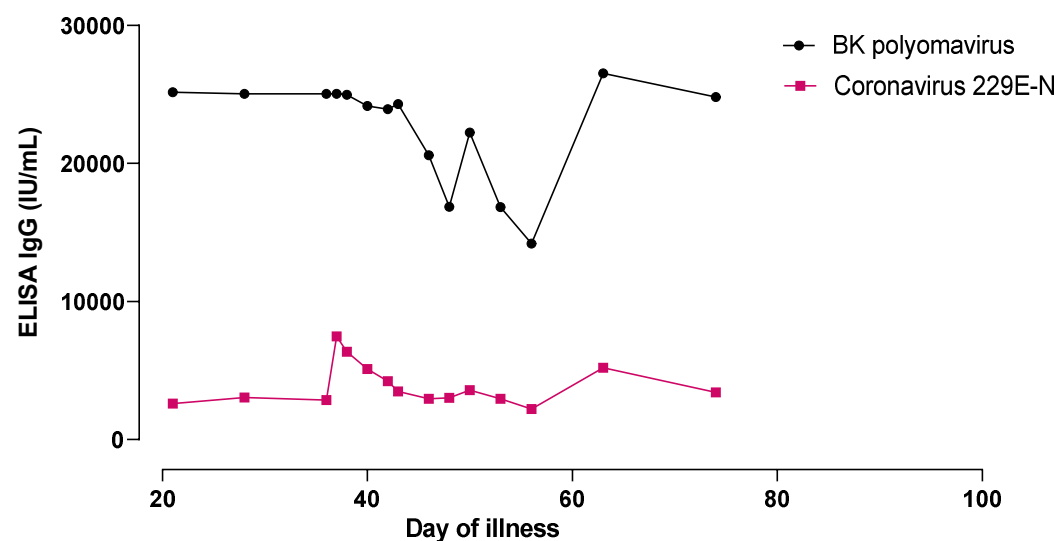

Figure S2. Anti-S antibodies (Wantai) in dilutions of plasma

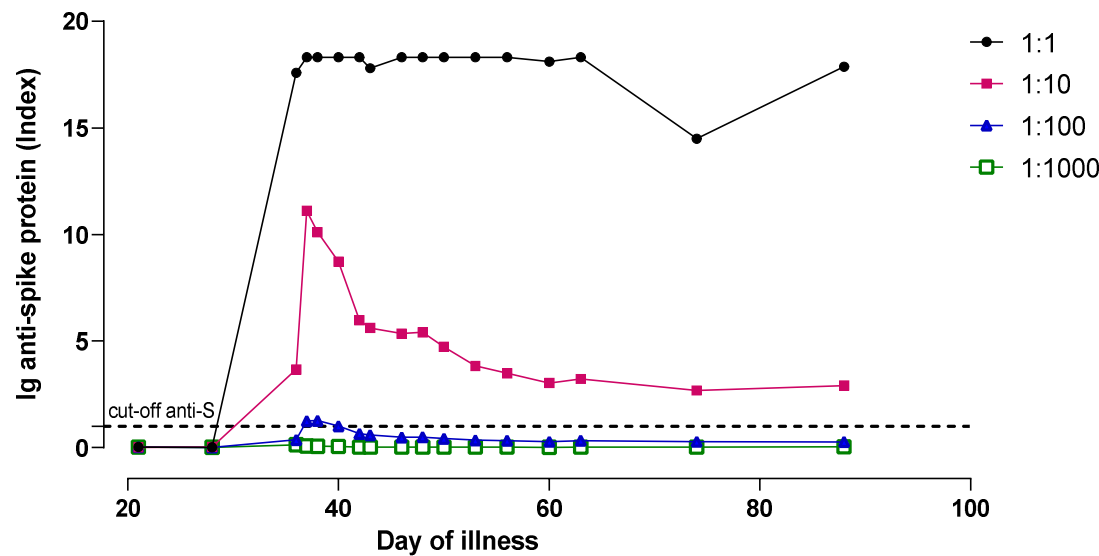

## Methods T cell assays

Patient's blood was sampled on day 53 and 88 after disease onset and PBMCs were isolated using Ficoll-Isopaque. After cryopreservation, PBMCs were thawed and  $1 \times 10^6$  cells were cultured in the presence of in 100  $\mu$ L IMDM (Lonza) + 10% FCS (Sigma) + 1.4% L-glutamine (Lonza) + 1% Pen/Strep (Lonza) + 5  $\mu$ g/mL Brefeldin A (Sigma). PBMCs were stimulated by supplementing culture conditions with 1  $\mu$ g/mL SARS-CoV-2 peptide pool derived from nucleocapsid (Miltenyi, cat#130-126-699), membrane (Miltenyi, cat#130-126-703), spike (Miltenyi, cat#130-126-701), 1% DMSO (negative control), or 1  $\mu$ g/mL CMV pp65 peptide pool (positive control). After overnight incubation, T cell frequency and activation was measured by staining for Zombie-Red (biolegend, cat#423110), CD4-Pe-Cy7 (Beckman Coulter, cat#737660), CD8-APC-H7 (BD Biosciences, cat#560179), Ki-67 (Dako, cat#F7268), HLA-DR (BD Biosciences, cat#560743), CD137-APC (BD Pharmingen, cat#550890), CD154-Pacific Blue (Biolegend, cat#310820), IFN $\gamma$ -BV711 (BD Biosciences, cat#564039), TNF $\alpha$ -BV421 (BD Biosciences, cat#566275), PD1-BUV661 (BD Biosciences, cat#750260), and CD38-BV605 (BD Biosciences, cat#740401). Cells were stained after fixation using 1% paraformaldehyde and permeabilization using 0.1% saponin (Sigma) + 2mL 200 g/L albumin + 1% pen/strep (Lonza) in PBS. Samples were measured on a 5-laser Cytex Aurora and analyzed by FlowJo v10.7.1. and GraphPad 8.4.2.

Figure S3.

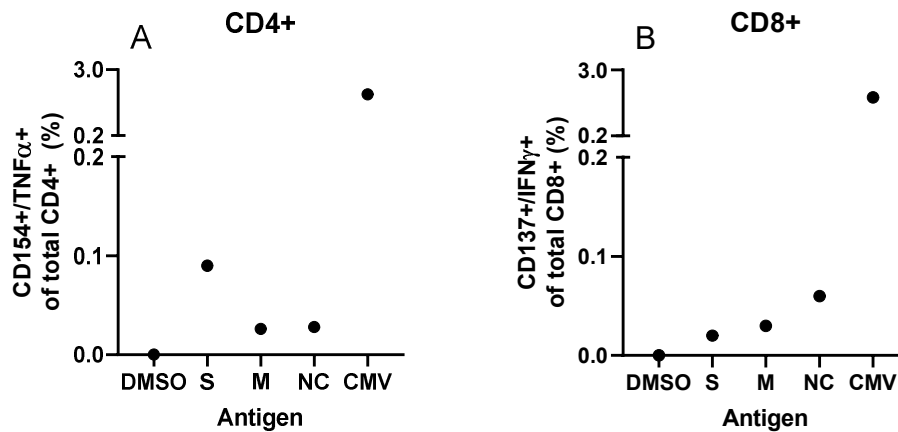

Reactivity of CD4+ and CD8+ T cells against SARS-CoV-2 proteins

FACS analysis of T cells obtained after overnight stimulation of PBMCs sampled at day 53 after symptom onset using peptides derived from SARS-CoV-2 spike (S), membrane (M), or nucleocapsid (NC) protein. Dimethylsulfoxide (DMSO) is used as a negative control, and cytomegalovirus (CMV) as positive control.

A. Frequency of CD4+ T cells specific for S, M, and NC is shown as % CD154+/TNFα+ of total CD4+ T cells.

B. Frequency of CD8+ T cells specific for S, M, and NC is shown as % CD137+/IFNγ+ of total CD8+ T cells.

**Figure S4. Activation marker expression on CD4+ and CD8+ T cells.**

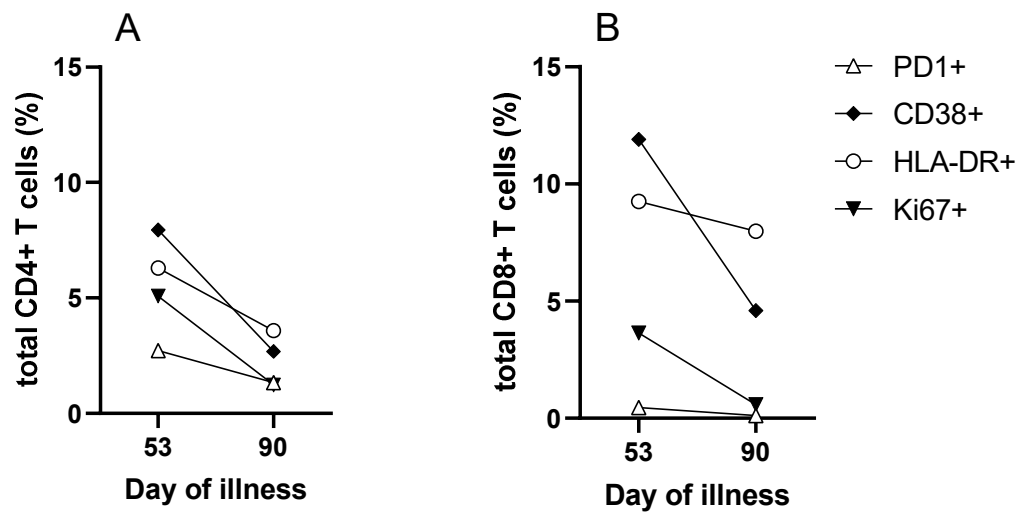

FACS analysis of T cells from PBMCs sampled on day 53 and 88 of illness.

A. Frequency of CD4+ T cells expressing activation markers PD1, CD38, HLA-DR or Ki67.

B. Frequency of CD8+ T cells expressing activation markers PD1, CD38, HLA-DR or Ki67.

**Table S1. Whole genome sequencing of all nasopharyngeal samples with sufficient viral load ( $C_T < 30$ )**

| Day of illness | Level | 5'UTR | NSP1  | NSP3   |        |        |        |        |        | NSP4   | NSP12   | NSP13   |         | NSP14   | NSP16   | Spike   |         | NS3     |         | NS7b    | NS8     | N*      |         |         |         |
|----------------|-------|-------|-------|--------|--------|--------|--------|--------|--------|--------|---------|---------|---------|---------|---------|---------|---------|---------|---------|---------|---------|---------|---------|---------|---------|
| 21             | NT    | C241T | C313T | C3037T | C3619T | G4510A | C5178T | 5184C  | C6541T | 9133C  | 14077A  | C14408T | C16646T | G17259T | G19480A | G21193T | C21846T | A23403G | 23536C  | C26060T | G27827T | G28086T | G28881A | G28882A | G28883C |
|                | AA    | -     | -     | -      | -      | -      | T820I  | -      | -      | -      | -       | P323L   | T137M   | E341D   | G481S   | D179Y   | T95I    | D614G   | -       | T223I   | M24I    | A65S    | R203K   | G204R   |         |
| 28             | NT    | C241T | C313T | C3037T | C3619T | G4510A | 5178C  | 5184C  | C6541T | 9133C  | 14077A  | C14408T | 16646C  | G17259T | G19480A | G21193T | C21846T | A23403G | 23536C  | C26060T | G27827T | G28086T | G28881A | G28882A | G28883C |
|                | AA    | -     | -     | -      | -      | -      | -      | -      | -      | -      | -       | P323L   | -       | E341D   | G481S   | D179Y   | T95I    | D614G   | -       | T223I   | M24I    | A65S    | R203K   | G204R   |         |
| 36             | NT    | C241T | C313T | C3037T | C3619T | G4510A | C5178T | 5184C  | C6541N | 9133C  | A14077G | C14408T | 16646C  | G17259T | G19480A | G21193T | C21846T | A23403G | 23536C  | C26060T | G27827N | G28086T | G28881A | G28882A | G28883C |
|                | AA    | -     | -     | -      | -      | -      | T820I  | -      | -      | -      | N213D   | P323L   | -       | E341D   | G481S   | D179Y   | T95I    | D614G   | -       | T223I   | -       | A65S    | R203K   | G204R   |         |
| 47             | NT    | C241T | C313T | C3037T | C3619T | G4510A | C5178T | 5184C  | C6541N | 9133C  | 14077A  | C14408T | 16646C  | G17259T | G19480A | G21193T | C21846T | A23403G | 23536C  | C26060T | G27827T | G28086T | G28881A | G28882A | G28883C |
|                | AA    | -     | -     | -      | -      | -      | T820I  | -      | -      | -      | -       | P323L   | -       | E341D   | G481S   | D179Y   | T95I    | D614G   | -       | T223I   | M24I    | A65S    | R203K   | G204R   |         |
| 53             | NT    | C241T | C313T | C3037T | C3619T | G4510A | 5178C  | C5184T | C6541T | 9133C  | 14077A  | C14408T | 16646C  | G17259T | G19480A | G21193T | C21846T | A23403G | C23536T | C26060T | G27827T | G28086T | G28881A | G28882A | G28883C |
|                | AA    | -     | -     | -      | -      | -      | -      | P822L  | -      | -      | -       | P323L   | -       | E341D   | G481S   | D179Y   | T95I    | D614G   | -       | T223I   | M24I    | A65S    | R203K   | G204R   |         |
| 63             | NT    | C241T | C313T | C3037T | C3619T | G4510A | 5178C  | C5184T | C6541T | C9133T | 14077A  | C14408T | 16646C  | G17259T | G19480A | G21193T | C21846T | A23403G | C23536T | C26060T | G27827T | G28086T | G28881A | G28882A | G28883C |
|                | AA    | -     | -     | -      | -      | -      | -      | P822L  | -      | -      | -       | P323L   | -       | E341D   | G481S   | D179Y   | T95I    | D614G   | -       | T223I   | M24I    | A65S    | R203K   | G204R   |         |

Abbreviations: AA indicates amino acid; NT indicates nucleotide

The initial SARS-CoV-2 genome sequence belonged to the B.1.1.209 lineage, with a total of 24 nucleotide substitutions throughout the genome compared to the original Wuhan-1 strain (10 synonymous mutations indicated in yellow shade and 14 non-synonymous mutations in blue).

– indicates no change in amino acid. The top line indicates the genomic regions of SARS-CoV-1. Cells marked in grey are regions that were not covered with sequencing, with N indicating that the nucleotide could not be determined (could be either A,T,C or G). During follow-up, non-synonymous substitutions detected in at least two consecutive isolates were observed at positions 5178 and 5184, resulting in T820I and P822L amino acid-replacements located in NSP3 involved in viral replication, but no non-synonymous mutations in the S protein were observed.

\* In the N region, three nucleotide mutations led to two AA changes (both G28881A and G28882A are part of the triplet encoding AA R203K).
